# Supplementary material for: Preparation of activated carbon nanofibers using degradative solvent extraction products obtained from low-rank coal and their utilization in supercapacitors
Source: Royal Society of Chemistry journal article supplement (doi:10.1039/c9ra09966b), 2020-01-01
Supplement: c9ra09966b1.pdf [file c9ra09966b1.pdf]

## Supplementary Material

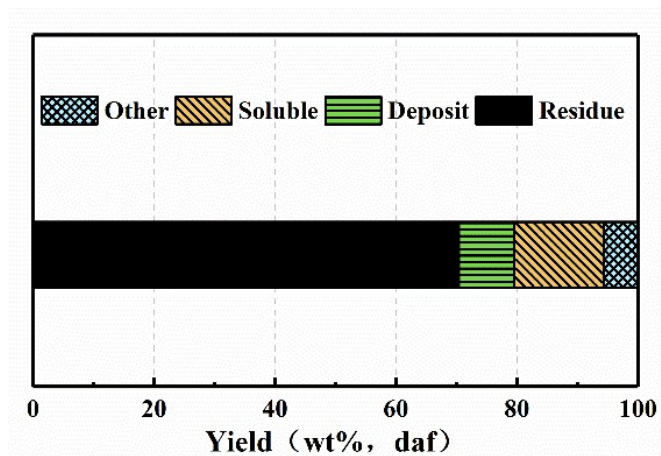

Fig. S1. The yield distribution of extraction products

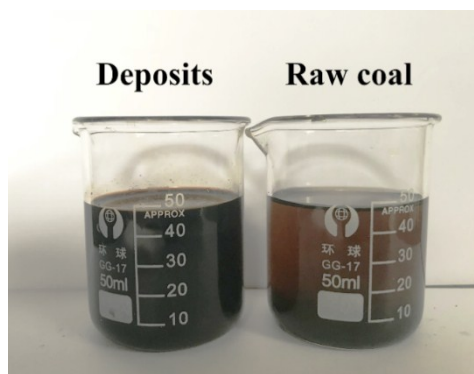

Fig. S2. Images of Deposit and raw coal dissolved in DMF after 48h
